# Supplementary material
Source: PubMed Central journal article supplement (PMC5998977)

**Table S1.** Top 20 significant upregulated and downregulated soleus genes. Genes are sorted by z ratio after significance was determined by  $p \leq 0.05$  and  $FDR \leq 0.3$ .

| EXADF vs CTRL |         |             |       |         | EXADF vs EX |         |             |       |         | EX vs CTRL |         |             |      |         | ADF vs CTRL  |         |             |        |         |
|---------------|---------|-------------|-------|---------|-------------|---------|-------------|-------|---------|------------|---------|-------------|------|---------|--------------|---------|-------------|--------|---------|
| Gene          | Z Ratio | Fold Change | FDR   | P Value | Gene        | Z Ratio | Fold Change | FDR   | P Value | Gene       | Z Ratio | Fold Change | FDR  | P Value | Gene         | Z Ratio | Fold Change | FDR    | P Value |
| Acot1         | 7.42    | 11.09       | 0.00  | 0.00    | Acot1       | 8.53    | 12.93       | 0.00  | 0.00    | Tmem196    | 7.79    | 9.79        | 0.10 | 3E-4    | Acot1        | 8.50    | 11.50       | 0.00   | 0.00    |
| Arrdc2        | 7.13    | 9.93        | 0.00  | 0.00    | Dlg2        | 7.67    | 37.64       | 0.24  | 0.03    | Frrs11     | 7.62    | 14.35       | 0.17 | 9E-4    | Gm364        | 5.69    | 9.85        | 0.03   | 7E-4    |
| Dlg2          | 6.62    | 28.40       | 0.28  | 0.03    | Onecut1     | 6.77    | 8.77        | 0.03  | 0.00    | Wdr54      | 6.82    | 5.78        | 0.05 | 10E-5   | Pdk4         | 5.44    | 3.96        | 2E-9   | 1E-12   |
| Lrrc39        | 6.45    | 10.87       | 0.08  | 4E-3    | Fam132b     | 5.77    | 4.33        | 2E-9  | 3E-12   | Entpd4     | 6.44    | 2.95        | 0.19 | 1E-3    | Acot2        | 5.31    | 4.76        | 0.00   | 0.00    |
| Ddit4         | 6.27    | 7.64        | 0.00  | 0.00    | Acox1       | 5.67    | 4.47        | 0.00  | 0.00    | Gapt       | 6.18    | 5.61        | 0.26 | 2E-3    | Unc93a       | 4.87    | 4.37        | 4E-11  | 1E-14   |
| Fam107a       | 5.81    | 5.23        | 4E-10 | 4E-13   | Speer6-ps1  | 5.18    | 3.37        | 9E-10 | 10E-13  | Unc93a     | 5.91    | 5.65        | 0.20 | 1E-3    | Isl2         | 4.25    | 3.93        | 2E-5   | 4E-8    |
| Tsks          | 5.55    | 4.80        | 0.03  | 9E-4    | Tectb       | 5.11    | 3.17        | 5E-8  | 5E-7    | Olf893     | 5.67    | 6.95        | 0.19 | 1E-3    | Acox1        | 4.25    | 3.59        | 8E-6   | 2E-8    |
| Lao1          | 5.36    | 4.25        | 0.00  | 0.00    | Zfp474      | 5.07    | 4.12        | 0.10  | 0.01    | Gm15401    | 5.53    | 5.86        | 0.25 | 2E-3    | Slc25a34     | 4.20    | 2.99        | 0.00   | 0.00    |
| Cebpd         | 5.27    | 5.95        | 0.00  | 0.00    | Arrdc2      | 5.06    | 3.99        | 6E-5  | 5E-7    | Zfp93      | 5.31    | 5.21        | 0.12 | 4E-4    | Ucp3         | 4.09    | 3.21        | 1.4E-9 | 8E-13   |
| Ms4a4a        | 5.16    | 4.27        | 3E-3  | 5E-5    | Fam132b     | 5.00    | 3.55        | 2E-8  | 5E-11   | Clspn      | 5.03    | 3.54        | 0.05 | 9E-5    | Cfap44       | 4.06    | 4.56        | 2E-5   | 4E-8    |
| Map3k6        | 5.13    | 4.74        | 0.00  | 0.00    | Lao1        | 5.00    | 3.20        | 6E-6  | 3E-8    | Padi3      | 4.98    | 3.92        | 0.00 | 2E-6    | Kcnt2        | 3.89    | 5.43        | 0.07   | 2E-3    |
| Cmklr1        | 5.04    | 6.43        | 0.09  | 5E-3    | Doc2b       | 4.91    | 3.46        | 8E-11 | 7E-14   | Ccdc113    | 4.56    | 3.65        | 0.03 | 6E-6    | Elf5         | 3.84    | 9.21        | 0.20   | 0.01    |
| Slc10a6       | 4.89    | 4.15        | 2E-7  | 4E-10   | Mapk4       | 4.85    | 4.25        | 0.03  | 1E-3    | Rgs11      | 4.25    | 3.54        | 0.28 | 2E-3    | Phc3         | 3.80    | 4.16        | 4E-3   | 4E-5    |
| Speer6-ps1    | 4.88    | 3.00        | 2E-5  | 8E-8    | Olf1321     | 4.68    | 5.30        | 0.08  | 4E-3    | Dnah6      | 4.22    | 2.74        | 0.27 | 2E-3    | Plin5        | 3.73    | 2.65        | 3E-10  | 1E-13   |
| Gm2379        | 4.80    | 3.48        | 3E-6  | 10E-9   | Unc93a      | 4.68    | 3.53        | 1E-6  | 5E-9    | Nxph4      | 3.83    | 3.76        | 0.28 | 2E-3    | Angptl4      | 3.71    | 2.75        | 4E-7   | 5E-10   |
| Olf1321       | 4.76    | 5.70        | 0.04  | 2E-3    | Vmn2r55     | 4.48    | 2.94        | 0.04  | 2E-3    | Mpv17      | 3.71    | 2.50        | 0.06 | 1E-4    | Olf1431      | 3.70    | 6.26        | 0.28   | 0.03    |
| Doc2b         | 4.71    | 3.73        | 3E-11 | 3E-14   | Fam107a     | 4.47    | 3.11        | 8E-6  | 4E-8    | Sphk2      | 3.48    | 2.04        | 0.17 | 9E-4    | Frrs11       | 3.70    | 6.61        | 0.22   | 0.02    |
| Acot2         | 4.68    | 4.46        | 1E-9  | 2E-12   | Ddit4       | 4.46    | 3.64        | 3E-7  | 9E-10   | Mrgprb1    | 3.45    | 2.50        | 0.16 | 8E-4    | Rufy4        | 3.51    | 3.08        | 2E-6   | 4E-9    |
| Klrb1b        | 4.68    | 2.22        | 0.24  | 0.03    | Isl2        | 4.45    | 2.91        | 0.00  | 0.00    | Cxcl13     | 3.38    | 2.14        | 0.21 | 1E-3    | Ehhadh       | 3.44    | 2.73        | 0.00   | 0.00    |
| Fkbp5         | 4.64    | 5.20        | 3E-7  | 7E-10   | Bcl2l1      | 4.44    | 2.63        | 2E-4  | 2E-6    | Kcnv2      | 3.04    | 2.06        | 0.00 | 5E-8    | Fa2h         | 3.41    | 2.71        | 5E-8   | 4E-11   |
| Kbtbd13       | -3.90   | -3.53       | 2E-3  | 3E-5    | Lad1        | -4.14   | -3.56       | 0.01  | 4E-4    | Slc32a1    | -3.47   | -2.78       | 0.11 | 4E-4    | Celf3        | -4.48   | -3.90       | 6E-5   | 2E-7    |
| Abca17        | -3.92   | -11.71      | 0.26  | 0.03    | Nalcn       | -4.16   | -4.56       | 0.03  | 9E-3    | Gnrh1      | -3.47   | -2.75       | 0.10 | 3E-4    | AU067648     | -4.50   | -4.47       | 0.02   | 4E-4    |
| Gpr149        | -3.92   | -6.68       | 0.12  | 0.01    | Gm30810     | -4.28   | -4.65       | 0.12  | 0.01    | Vmn1r32    | -3.52   | -3.45       | 0.19 | 1E-3    | Gabrg2       | -4.53   | -3.12       | 0.01   | 2E-4    |
| Erich3        | -3.95   | -5.09       | 0.01  | 3E-4    | Grin3a      | -4.32   | -5.42       | 0.22  | 0.02    | Itin1      | -3.55   | -3.07       | 0.24 | 2E-3    | Gm10385      | -4.54   | -2.82       | 0.06   | 2E-3    |
| Efna2         | -4.01   | -3.81       | 1E-3  | 1E-5    | Rbp1        | -4.32   | -6.86       | 0.11  | 0.01    | Spon2      | -3.64   | -2.89       | 0.14 | 6E-4    | Olf71        | -4.57   | -6.82       | 0.16   | 0.01    |
| Slamf8        | -4.04   | -5.16       | 0.01  | 2E-4    | St6gal1     | -4.36   | -5.50       | 0.01  | 2E-4    | Zcwpw1     | -3.69   | -2.63       | 0.00 | 9E-8    | Rgs20        | -4.62   | -5.68       | 0.11   | 0.01    |
| Olf351        | -4.10   | -5.43       | 8E-4  | 8E-6    | Kbtbd13     | -4.46   | -3.81       | 3E-1  | 5E-5    | Gm33206    | -3.79   | -2.49       | 0.25 | 2E-3    | Gli1         | -4.63   | -3.82       | 4E-4   | 2E-6    |
| Pon1          | -4.11   | -4.44       | 6E-6  | 2E-8    | BC023105    | -4.55   | -4.44       | 0.01  | 2E-4    | Slc5a1     | -3.80   | -3.61       | 0.14 | 6E-4    | Rab11fip4os1 | -4.64   | -4.56       | 0.03   | 6E-4    |
| Slc9a5        | -4.12   | -6.24       | 0.01  | 3E-4    | Bhmt        | -4.65   | -3.99       | 2E-5  | 2E-7    | Ttc22      | -3.80   | -3.06       | 0.00 | 2E-9    | Onecut1      | -4.77   | -8.52       | 0.26   | 0.02    |
| Olf284        | -4.13   | -5.80       | 0.27  | 0.03    | Cysltr2     | -4.67   | -7.80       | 0.10  | 0.01    | Sema4g     | -3.84   | -2.44       | 0.20 | 1E-3    | B4galt5      | -4.79   | -6.50       | 0.04   | 9E-4    |
| Gm20767       | -4.15   | -3.84       | 0.21  | 0.02    | Gabrb3      | -4.85   | -11.72      | 0.15  | 0.01    | Defb46     | -3.85   | -3.48       | 0.21 | 1E-3    | Tcp11        | -4.84   | -3.68       | 0.14   | 0.01    |
| Fabp6         | -4.17   | -5.95       | 0.03  | 1E-3    | Olf284      | -4.94   | -4.16       | 0.13  | 0.01    | Akr1b7     | -3.91   | -3.39       | 0.08 | 2E-4    | Rbm46os      | -4.89   | -3.75       | 0.04   | 8E-4    |
| Gm9936        | -4.20   | -5.09       | 0.01  | 3E-4    | Gm15401     | -5.54   | -9.30       | 0.02  | 5E-4    | Slc22a2    | -4.01   | -2.50       | 0.21 | 1E-3    | AA617406     | -4.92   | -3.45       | 0.05   | 1E-3    |
| Rhox4a        | -4.23   | -10.37      | 0.14  | 0.01    | Gm364       | -5.61   | -7.74       | 0.16  | 0.01    | Veph1      | -4.01   | -2.71       | 0.16 | 8E-4    | Fam166b      | -4.96   | -5.14       | 0.00   | 4E-5    |
| Lax1          | -4.28   | -4.43       | 0.16  | 0.01    | Cyp7a1      | -5.90   | -6.70       | 0.02  | 7E-4    | Pcdh15     | -4.04   | -3.17       | 0.11 | 4E-4    | Gm20767      | -4.98   | -4.33       | 0.05   | 1E-3    |
| AA617406      | -4.32   | -3.92       | 0.15  | 0.01    | Olf351      | -5.91   | -13.67      | 0.06  | 3E-3    | Olf381     | -4.07   | -2.68       | 0.12 | 4E-4    | Hcn3         | -5.06   | -4.93       | 2E-3   | 1E-5    |
| Hsf3          | -4.50   | -15.01      | 0.19  | 0.02    | Olf764-ps1  | -6.17   | -8.63       | 0.10  | 0.01    | Clec4g     | -4.16   | -3.12       | 0.00 | 5E-9    | Mirg         | -5.08   | -5.74       | 4E-3   | 3E-5    |
| Nalcn         | -4.64   | -6.86       | 0.03  | 1E-3    | Tmem196     | -6.20   | -5.71       | 0.17  | 0.01    | Mdga2      | -4.22   | -2.56       | 0.08 | 2E-4    | Gsg11        | -5.16   | -3.62       | 3E-7   | 3E-10   |
| Hgd           | -4.90   | -7.84       | 0.12  | 0.01    | Ifnl3       | -7.40   | -160.32     | 0.20  | 0.02    | Agxt2      | -4.68   | -3.54       | 0.00 | 8E-7    | Gm5486       | -5.25   | -3.26       | 0.12   | 0.01    |
| Rgs20         | -5.01   | -7.63       | 0.11  | 0.01    | Gapt        | -7.73   | -14.30      | 6E-4  | 7E-6    | Ctrc       | -5.56   | -5.56       | 0.14 | 6E-4    | Ctrc         | -5.42   | -5.12       | 0.01   | 10E-5   |

**Table S2.** Top 20 significant upregulated and downregulated liver genes. Genes are sorted by z ratio after significance was determined by  $p \leq 0.05$  and  $FDR \leq 0.3$ .

| Gene      | EXADF vs CTRL |             |       |         | Gene     | EXADF vs EX |             |       |         | Gene      | EX vs CTRL |             |      |         | Gene         | ADF vs CTRL |             |       |         |
|-----------|---------------|-------------|-------|---------|----------|-------------|-------------|-------|---------|-----------|------------|-------------|------|---------|--------------|-------------|-------------|-------|---------|
|           | Z Ratio       | Fold Change | FDR   | P Value |          | Z Ratio     | Fold Change | FDR   | P Value |           | Z Ratio    | Fold Change | FDR  | P Value |              | Z Ratio     | Fold Change | FDR   | P Value |
| Mmel1     | 7.11          | 1142.82     | 0.00  | 0.00    | Fmo3     | 13.96       | 75.22       | 0.00  | 0.00    | Lca5      | 7.06       | 1148.59     | 0.00 | 0.00    | Fmo3         | 8.72        | 51.42       | 0.00  | 0.00    |
| Lca5      | 6.75          | 1184.95     | 0.00  | 0.00    | Cux2     | 10.71       | 25.30       | 0.00  | 0.00    | Mmel1     | 6.98       | 569.36      | 0.00 | 0.00    | Cux2         | 6.42        | 19.41       | 0.00  | 0.00    |
| Gm31649   | 6.75          | 780.00      | 0.00  | 0.00    | Cyp4a31  | 7.56        | 11.49       | 0.00  | 0.00    | Btn1a1    | 6.83       | 1196.12     | 0.00 | 0.00    | Gm10804      | 5.37        | 7.45        | 4E-11 | 2E-13   |
| Chd5      | 6.61          | 713.74      | 0.00  | 0.00    | Fam107a  | 7.13        | 11.94       | 2E-6  | 2E-8    | Gm31649   | 6.75       | 428.15      | 0.00 | 0.00    | Cyp2b9       | 4.93        | 8.61        | 4E-10 | 3E-12   |
| Btn1a1    | 6.51          | 1500.40     | 0.00  | 0.00    | Cyp4a10  | 6.95        | 10.04       | 0.00  | 0.00    | Gm1096    | 6.68       | 851.54      | 0.00 | 0.00    | Cyp2b13      | 4.75        | 9.18        | 6E-8  | 7E-10   |
| Gm5486    | 6.38          | 541.42      | 0.00  | 0.00    | Gm10804  | 6.45        | 8.08        | 1E-10 | 3E-13   | Gm13375   | 6.25       | 706.39      | 0.00 | 0.00    | Rad51b       | 4.69        | 7.26        | 0.00  | 0.00    |
| Gm1096    | 6.18          | 762.00      | 0.00  | 0.00    | Unc93a   | 6.34        | 10.63       | 2E-4  | 4E-6    | Gpr156    | 6.17       | 227.52      | 0.00 | 0.00    | Cyp4a10      | 4.59        | 6.14        | 0.00  | 0.00    |
| Gm13375   | 6.00          | 761.21      | 0.00  | 0.00    | Grin1    | 5.95        | 16.47       | 0.03  | 2E-3    | Chd5      | 5.84       | 199.55      | 0.00 | 0.00    | Cyp4a31      | 4.58        | 6.13        | 0.00  | 0.00    |
| Zbtb26    | 5.87          | 404.98      | 0.00  | 0.00    | Slc10a6  | 5.88        | 6.18        | 2E-9  | 6E-12   | Itgb3     | 5.80       | 193.19      | 0.00 | 0.00    | Cyp4a14      | 4.20        | 5.32        | 0.00  | 0.00    |
| Epha6     | 5.83          | 243.17      | 0.00  | 0.00    | Rad51b   | 5.72        | 6.08        | 0.00  | 0.00    | Zbtb26    | 5.74       | 208.06      | 0.00 | 0.00    | Acot3        | 4.11        | 5.08        | 0.00  | 0.00    |
| Itgb3     | 5.75          | 308.84      | 0.00  | 0.00    | Olfml2a  | 5.39        | 7.64        | 8E-4  | 2E-5    | Ccdc169   | 5.74       | 206.07      | 0.00 | 0.00    | Cyp4a32      | 3.57        | 4.10        | 1E-12 | 7E-15   |
| Ccdc169   | 5.74          | 348.59      | 0.00  | 0.00    | Plin4    | 5.35        | 5.51        | 1E-13 | 2E-16   | Vgll2     | 5.72       | 177.26      | 0.00 | 0.00    | Msmg         | 3.55        | 4.07        | 2E-10 | 1E-12   |
| Vgll2     | 5.72          | 308.58      | 0.00  | 0.00    | Fkbp5    | 5.34        | 6.60        | 3E-11 | 6E-14   | Inadl     | 5.71       | 182.18      | 0.00 | 0.00    | Cyp2b10      | 3.41        | 3.70        | 3E-4  | 3E-5    |
| Gm7157    | 5.68          | 277.82      | 0.00  | 0.00    | Usp13    | 5.34        | 9.33        | 0.02  | 1E-3    | Rbm3      | 5.66       | 174.76      | 0.00 | 0.00    | Slc4a9       | 3.39        | 4.52        | 1E-3  | 2E-4    |
| A3galt2   | 5.66          | 372.14      | 0.00  | 0.00    | Acot3    | 5.29        | 5.66        | 0.00  | 0.00    | Epha6     | 5.63       | 119.36      | 0.00 | 0.00    | Acot5        | 3.36        | 3.93        | 0.00  | 0.00    |
| Inadl     | 5.65          | 301.56      | 0.00  | 0.00    | Bmper    | 5.08        | 4.22        | 8E-3  | 3E-4    | Camk2a    | 5.47       | 325.00      | 0.00 | 0.00    | Agpat9       | 3.35        | 3.66        | 0.00  | 0.00    |
| Hivep3    | 5.60          | 358.34      | 0.00  | 0.00    | Gm35911  | 5.01        | 5.04        | 5E-3  | 2E-4    | A3galt2   | 5.46       | 265.41      | 0.00 | 0.00    | Plin4        | 3.32        | 3.47        | 7E-9  | 7E-11   |
| Gpr156    | 5.58          | 350.19      | 1E-15 | 2E-16   | Olf444   | 4.97        | 4.30        | 0.05  | 4E-3    | Gm5486    | 5.46       | 133.88      | 0.00 | 0.00    | Tmem43       | 3.30        | 3.66        | 0.00  | 0.00    |
| Cplx1     | 5.58          | 213.14      | 0.00  | 0.00    | Cxcl13   | 4.95        | 6.35        | 3E-4  | 5E-6    | Hivep3    | 5.41       | 170.68      | 0.00 | 0.00    | Mfsd7c       | 3.15        | 3.28        | 0.00  | 0.00    |
| Gm4278    | 5.58          | 1064.90     | 5E-14 | 8E-15   | Acnat2   | 4.82        | 5.19        | 0.00  | 0.00    | Gm7157    | 5.39       | 133.61      | 0.00 | 0.00    | Slco1a4      | 3.15        | 3.33        | 0.00  | 0.00    |
| Fgf6      | -3.23         | -51.72      | 0.00  | 0.00    | Atp4a    | -5.33       | -5.63       | 0.00  | 0.00    | Dvl3      | -3.32      | -41.02      | 0.00 | 0.00    | Gm9948       | -4.02       | -5.60       | 3E-7  | 5E-9    |
| Sult4a1   | -3.24         | -61.80      | 0.00  | 0.00    | Hmgcs1   | -5.35       | -4.48       | 0.00  | 0.00    | Mpp4      | -3.33      | -53.78      | 0.00 | 0.00    | Tas2r118     | -4.05       | -4.71       | 1E-5  | 4E-7    |
| Krt85     | -3.25         | -46.14      | 0.00  | 0.00    | Gm15998  | -5.36       | -5.06       | 0.00  | 0.00    | Gm3373    | -3.35      | -44.92      | 0.00 | 0.00    | Fnd3c2       | -4.13       | -3.90       | 2E-5  | 8E-7    |
| Cma2      | -3.26         | -57.56      | 0.00  | 0.00    | Gale     | -5.44       | -5.02       | 0.00  | 0.00    | Shank1    | -3.36      | -58.27      | 0.00 | 0.00    | Dcaf1212     | -4.18       | -4.44       | 3E-4  | 2E-5    |
| Mpp4      | -3.27         | -68.68      | 0.00  | 0.00    | Gnat1    | -5.47       | -4.83       | 7E-9  | 3E-11   | Gm1305    | -3.37      | -39.00      | 0.00 | 0.00    | Ttll6        | -4.23       | -2.90       | 2E-4  | 1E-5    |
| Dvl3      | -3.27         | -45.29      | 0.00  | 0.00    | Pnpla3   | -5.54       | -6.43       | 1E-6  | 9E-9    | Olf740    | -3.40      | -58.20      | 0.00 | 0.00    | Gm6329       | -4.24       | -4.30       | 3E-4  | 2E-5    |
| Gm8709    | -3.30         | -41.23      | 0.00  | 0.00    | Thrsp    | -5.61       | -4.63       | 4E-12 | 8E-15   | Rasgrf2   | -3.40      | -61.23      | 0.00 | 0.00    | Zfp536       | -4.25       | -3.85       | 1E-4  | 6E-6    |
| Foxl2     | -3.31         | -62.40      | 0.00  | 0.00    | Slc2a4   | -5.87       | -7.74       | 3E-4  | 5E-6    | LOC677525 | -3.41      | -56.90      | 0.00 | 0.00    | Aqp8         | -4.27       | -8.68       | 0.00  | 0.00    |
| Ccdc42b   | -3.35         | -68.52      | 0.00  | 0.00    | Acly     | -5.92       | -6.17       | 2E-9  | 8E-12   | Sult4a1   | -3.42      | -60.25      | 0.00 | 0.00    | Cfd          | -4.35       | -13.21      | 4E-3  | 6E-4    |
| Ephb2     | -3.40         | -53.13      | 0.00  | 0.00    | Serpina7 | -6.08       | -5.78       | 0.00  | 0.00    | Tmem174   | -3.46      | -53.59      | 0.00 | 0.00    | Rab9b        | -4.36       | -61.39      | 0.07  | 0.02    |
| Ptk7      | -3.43         | -62.27      | 0.00  | 0.00    | Gngt1    | -6.30       | -7.01       | 0.00  | 0.00    | BB094273  | -3.48      | -52.00      | 0.00 | 0.00    | Egr1         | -4.40       | -9.00       | 4E-6  | 1E-7    |
| Tex22     | -3.51         | -58.13      | 0.00  | 0.00    | Adgrf1   | -6.50       | -7.01       | 0.00  | 0.00    | Tex22     | -3.49      | -46.41      | 0.00 | 0.00    | Crygf        | -4.49       | -3.39       | 1E-4  | 8E-6    |
| Krtap19-4 | -3.56         | -65.87      | 0.00  | 0.00    | Acacb    | -6.59       | -7.67       | 0.00  | 0.00    | Ccdc42b   | -3.52      | -64.73      | 0.00 | 0.00    | Serpina12    | -4.81       | -12.25      | 10E-5 | 5E-6    |
| Olf740    | -3.59         | -92.04      | 0.00  | 0.00    | Egr1     | -6.76       | -7.37       | 8E-4  | 2E-5    | Krtap19-4 | -3.54      | -52.64      | 0.00 | 0.00    | Thrsp        | -4.85       | -11.92      | 0.00  | 0.00    |
| Egr1      | -3.61         | -47.55      | 0.00  | 0.00    | Aqp8     | -7.01       | -6.74       | 0.00  | 0.00    | Gjc2      | -3.55      | -64.94      | 0.00 | 0.00    | Serpina4-ps1 | -5.11       | -15.42      | 3E-7  | 6E-9    |
| Gm14635   | -3.62         | -93.96      | 0.00  | 0.00    | Elovl6   | -7.34       | -8.67       | 0.00  | 0.00    | Trim43c   | -3.56      | -60.57      | 0.00 | 0.00    | Chrna4       | -5.36       | -14.51      | 0.00  | 0.00    |
| Trim43c   | -3.67         | -91.44      | 0.00  | 0.00    | Chrna4   | -7.66       | -13.07      | 3E-8  | 1E-10   | Dlk2      | -3.59      | -61.43      | 0.00 | 0.00    | Fasn         | -5.53       | -15.96      | 0.00  | 0.00    |
| Vmn1r217  | -3.69         | -77.46      | 0.00  | 0.00    | Fasn     | -8.79       | -14.44      | 0.00  | 0.00    | Lhfp14    | -3.64      | -63.23      | 0.00 | 0.00    | Hsd3b5       | -5.59       | -9.37       | 8E-5  | 4E-6    |
| Gjc2      | -3.73         | -104.13     | 0.00  | 0.00    | Fabp5    | -9.38       | -15.12      | 0.00  | 0.00    | Gm14635   | -3.80      | -81.42      | 0.00 | 0.00    | Fabp5        | -5.60       | -14.00      | 0.00  | 0.00    |
| Lhfp14    | -3.74         | -94.19      | 0.00  | 0.00    | Moxd1    | -10.60      | -41.82      | 7E-7  | 4E-9    | Vmn1r217  | -3.84      | -86.60      | 0.00 | 0.00    | Moxd1        | -5.89       | -25.71      | 4E-6  | 1E-7    |

**Table S3.** Significant upregulated and downregulated liver metabolites in the plasma. Metabolites are sorted by fold changes after significance was determined by  $p \leq 0.05$  and  $FDR \leq 0.3$ .

| Metabolites                     | Fold Changes vs. CTRL |          |          | F - value | p- value | FDR -adjust. p- value |
|---------------------------------|-----------------------|----------|----------|-----------|----------|-----------------------|
|                                 | ADF                   | EX       | EXADF    |           |          |                       |
| N-acetylglycine NIST            | 2.450849              | -0.01281 | 2.405789 | 92.24348  | 1.93E-15 | 3.25E-13              |
| 3-hydroxybutyric acid           | 2.509298              | -0.68384 | 2.232061 | 77.08875  | 2.22E-14 | 1.88E-12              |
| 2-hydroxy-2-methylbutanoic acid | 0.99572               | 0.04563  | 1.240141 | 31.07033  | 2.00E-09 | 1.13E-07              |
| 2,3-dihydroxybutanoic acid NIST | 1.265758              | 0.340921 | 0.889835 | 22.35978  | 7.25E-08 | 3.06E-06              |
| 2-hydroxyglutaric acid          | 0.637893              | -0.0569  | 0.623619 | 16.3118   | 1.61E-06 | 5.43E-05              |
| glycerol-3-galactoside          | -1.01678              | 0.147445 | -0.80877 | 14.94613  | 3.56E-06 | 0.000100201           |
| 2-deoxtetronic acid NIST        | 1.096169              | -0.07968 | 0.835316 | 12.65729  | 1.49E-05 | 0.000358943           |
| beta-sitosterol                 | -0.86166              | -0.02971 | -0.53487 | 11.25848  | 3.82E-05 | 0.000806613           |
| 2-ketoisocaproic acid           | 0.849218              | 0.032862 | 0.630059 | 10.22205  | 7.98E-05 | 0.001498761           |
| pinitol                         | -1.18857              | -0.36579 | -1.19717 | 9.904613  | 0.000101 | 0.001702655           |
| methanolphosphate               | -0.71061              | -0.75686 | -0.84899 | 8.817889  | 0.00023  | 0.00352966            |
| N-methylalanine                 | 0.529                 | -0.10252 | 0.13082  | 8.10934   | 0.000403 | 0.005395296           |
| hippuric acid                   | -1.08209              | -0.06779 | -0.82391 | 8.072197  | 0.000415 | 0.005395296           |
| glycerol-alpha-phosphate        | -0.65629              | -0.01981 | -0.4389  | 7.720119  | 0.000553 | 0.006675247           |
| indole-3-lactate                | 0.557571              | -0.07104 | 0.290707 | 7.218672  | 0.00084  | 0.009332841           |
| glycine                         | 0.428782              | 0.029208 | 0.442678 | 7.158449  | 0.000884 | 0.009332841           |
| dihydrocholesterol              | -0.64765              | -0.08614 | -0.51815 | 6.86952   | 0.001131 | 0.010762331           |
| 1-monoolein                     | -0.30679              | -0.3634  | -0.87343 | 6.853431  | 0.001146 | 0.010762331           |
| cholesterol                     | -0.33351              | 0.032408 | -0.14744 | 6.743382  | 0.00126  | 0.011211359           |
| citrulline                      | -0.01376              | -0.20474 | -0.57962 | 6.47607   | 0.001591 | 0.013444464           |
| xylose                          | 0.095818              | -0.21321 | 1.497686 | 5.964802  | 0.002508 | 0.019878235           |
| glucose                         | -0.29888              | 0.102982 | -0.08238 | 5.929937  | 0.002588 | 0.019878235           |
| 2-hydroxybutanoic acid          | 0.56843               | -0.13366 | 0.511111 | 5.819293  | 0.002861 | 0.021019832           |
| tryptophan                      | 0.291358              | -0.07121 | 0.150552 | 5.433872  | 0.004076 | 0.028703575           |
| alanine                         | -0.33363              | 0.12981  | -0.17732 | 5.265628  | 0.004769 | 0.031369387           |
| conduritol-beta-epoxide         | -0.42853              | -0.06764 | -0.23355 | 5.252911  | 0.004826 | 0.031369387           |
| threonic acid                   | -0.04572              | 0.169061 | 0.546101 | 5.078617  | 0.005687 | 0.033239481           |
| lyxose                          | 0.066977              | -0.14862 | 1.144785 | 5.076739  | 0.005698 | 0.033239481           |
| lysine                          | -0.34566              | -0.06616 | -0.40347 | 4.970304  | 0.006304 | 0.03550976            |

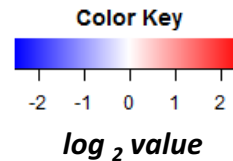

**Table S4.** Primers used in RT-qPCR analyses.

|                | <b>Forward Sequence</b>  | <b>Reverse Sequence</b>  |
|----------------|--------------------------|--------------------------|
| ACADL          | CGCGTCTAGAAACTCCTTCTG    | CCAGACCTCTCTACTCACTTCT   |
| Actin          | TATTGGCAACGAGCGG         | CGGATGTCAACGTAC          |
| B2M            | GGAAGCCGAACATACTGAACTG   | GAAAGACCAGTCCTTGCTGAAG   |
| FASN           | TCGTTTCATCAGGCCACTATAC   | ATAACTTGGAGTTCGGGTCTTC   |
| HPRT           | GACCTCTCGAAGTGTTGGATAC   | TCAACAGGACTCCTCGTATTTG   |
| LIPE           | CATCAACCACTGTGAGGGTAAG   | TTCCCGTAGGTCATAGGAGATG   |
| NRF1           | TTCATGGACCCAGGCATTAC     | GTCTGTGATGGTACGAGATGAG   |
| NRF2           | ATGACTCTGACTCTGGCATTTC   | GCACTATCTAGCTCCTCCATTTC  |
| PDK4           | GGATTACTGACCGCCTCTTTAG   | ATGATAGCGTCTGTCCCATAAC   |
| PGC-1 $\alpha$ | AGCACTCAGAACCATGCAGCAAAC | TTTGGTGTGAGGAGGGTCATCGTT |
| PPAR- $\alpha$ | CATACAGGAGAGCAGGGATTG    | CCATTTCCGGTAGCAGGTAGTC   |
| SIRT1          | GTGAGACCAGTAGCACTAATTCC  | CACCTAGCCTATGACACAACCTC  |
| TFAM           | AGGGCCTACTCATCAAGAAATG   | ACACACAACAAACCCAAGAAAG   |

**Figure S1.** Top up and downregulated GO pathways in the soleus muscle.

**ADF vs CTRL**

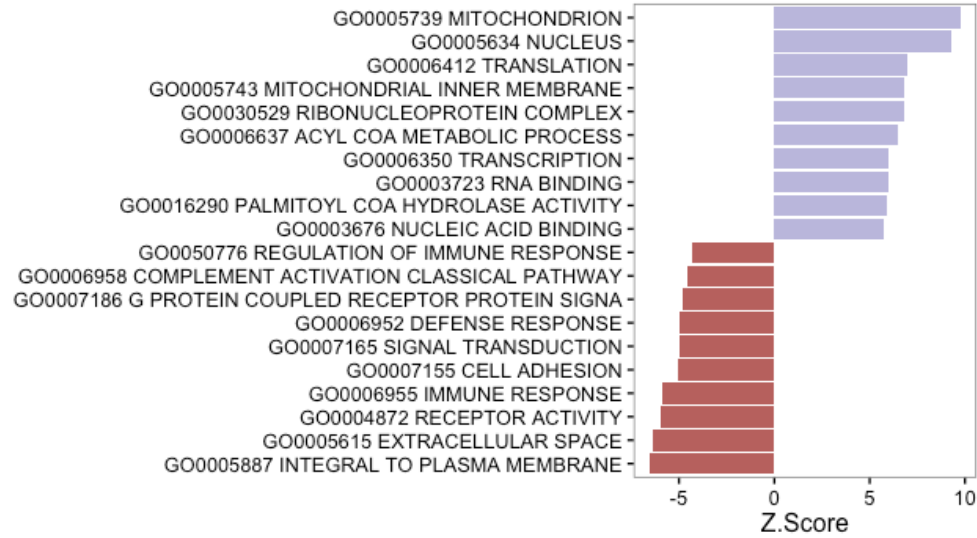

**EXADF vs CTRL**

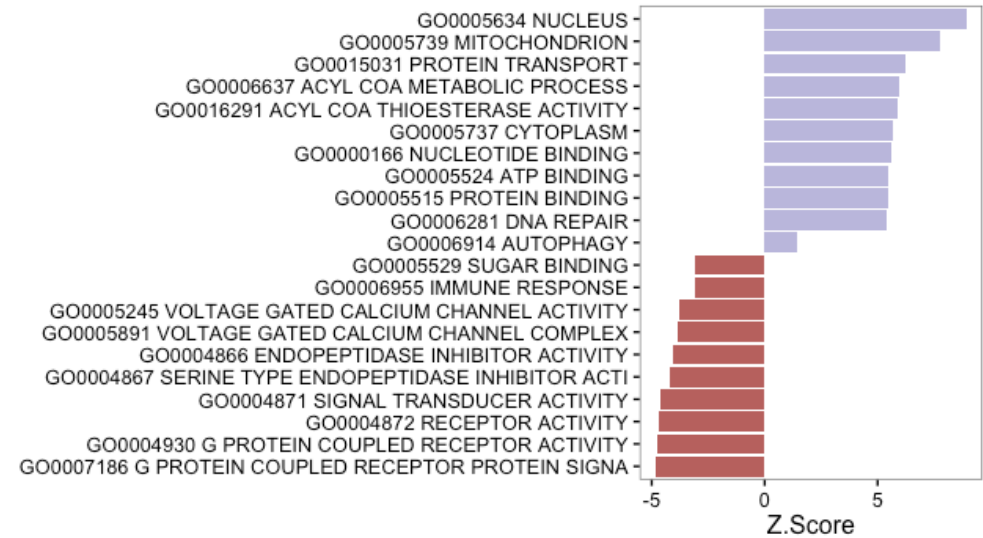

**EX vs CTRL**

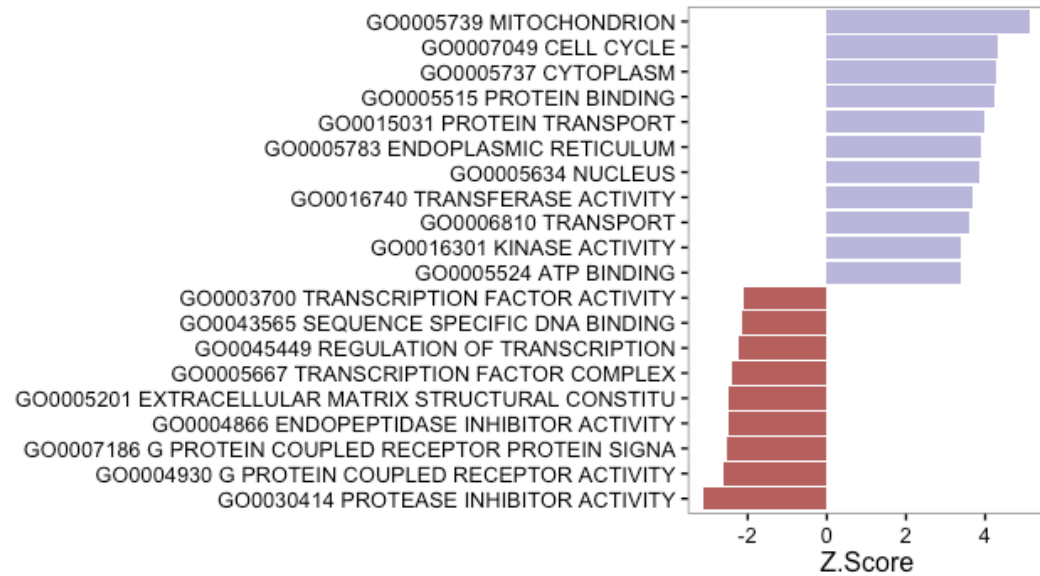

**EXADF vs EX**

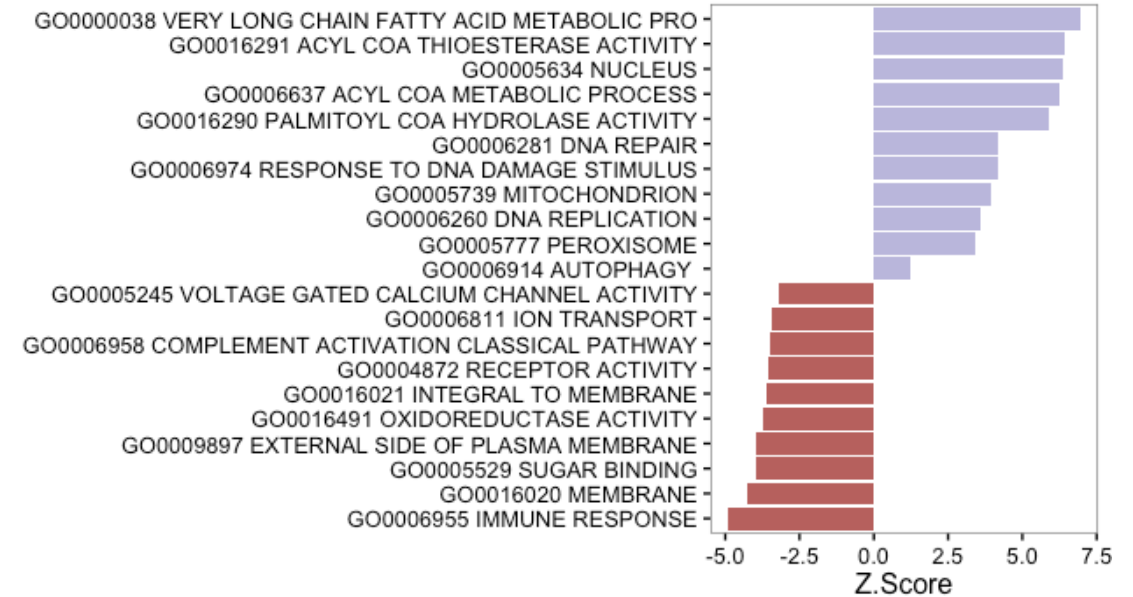

**Figure S2.** Top up and downregulated GO pathways in the liver.

**ADF vs CTRL**

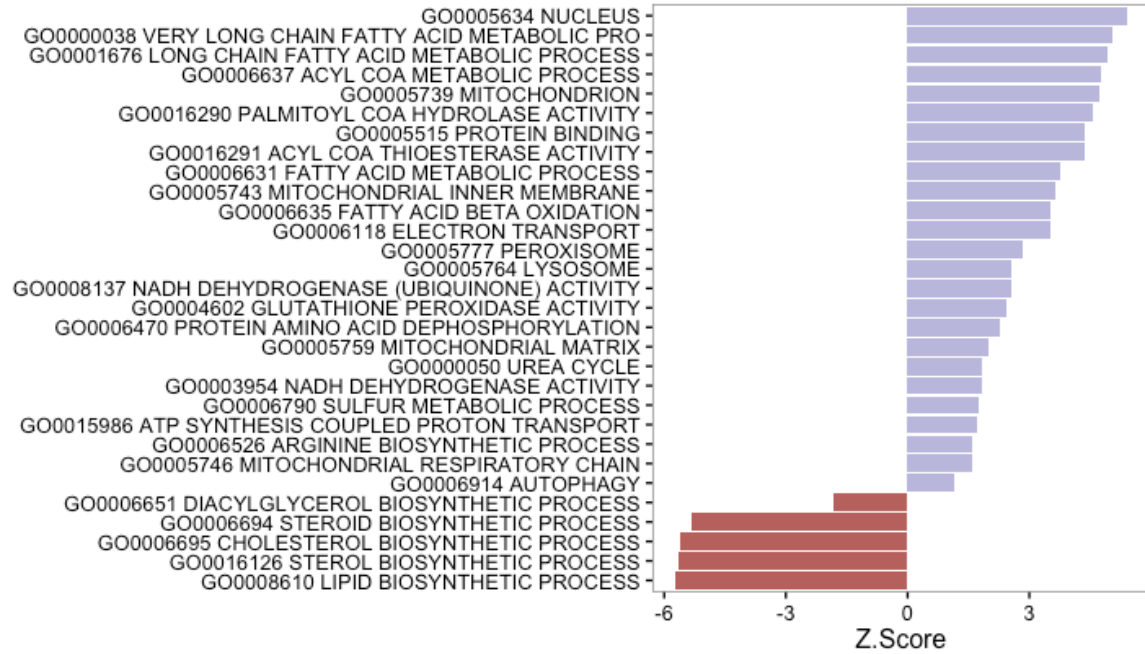

**EX vs CTRL**

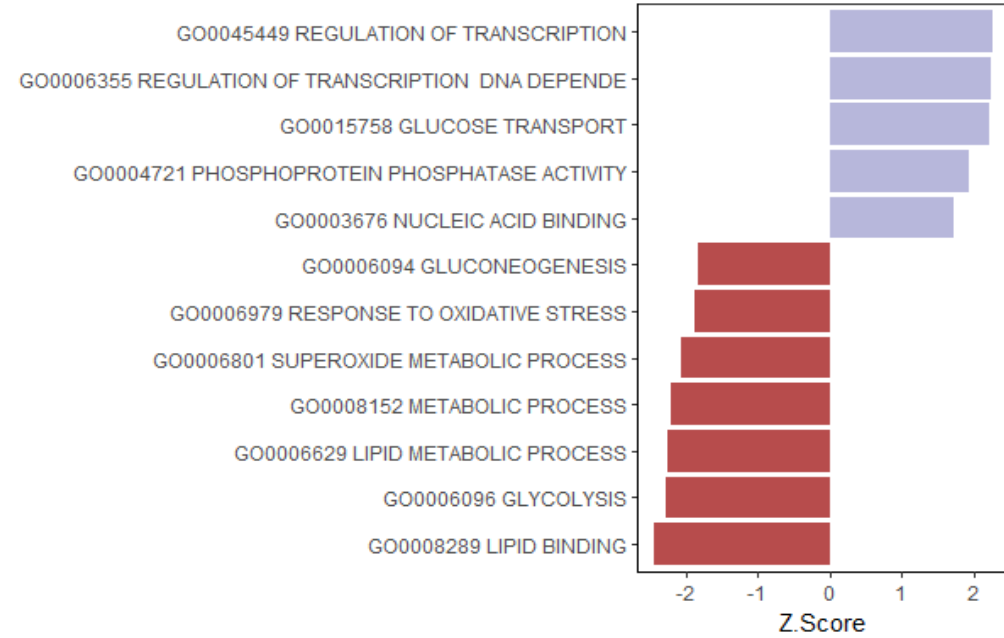

**EXADF vs CTRL**

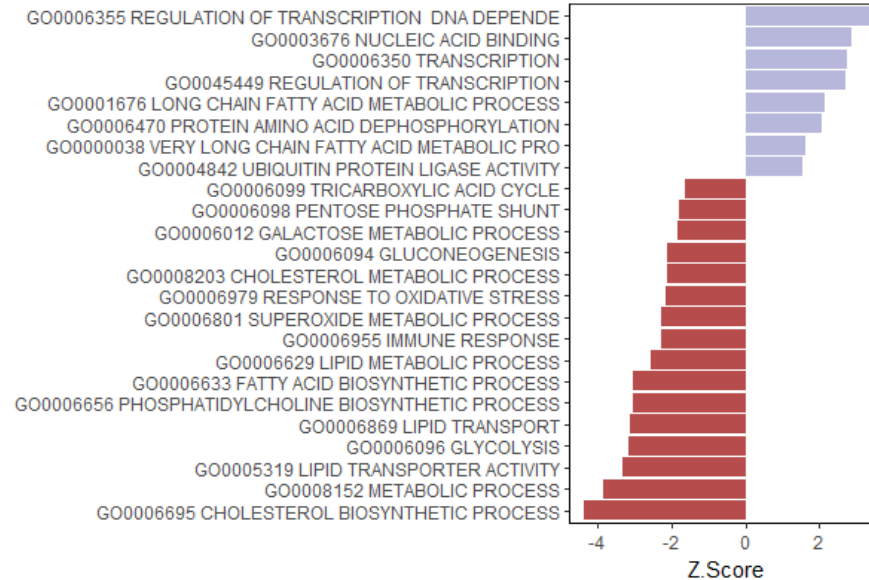

**Figure S3.** Immunoblots showing levels of OXPHOS proteins in soleus tissue.

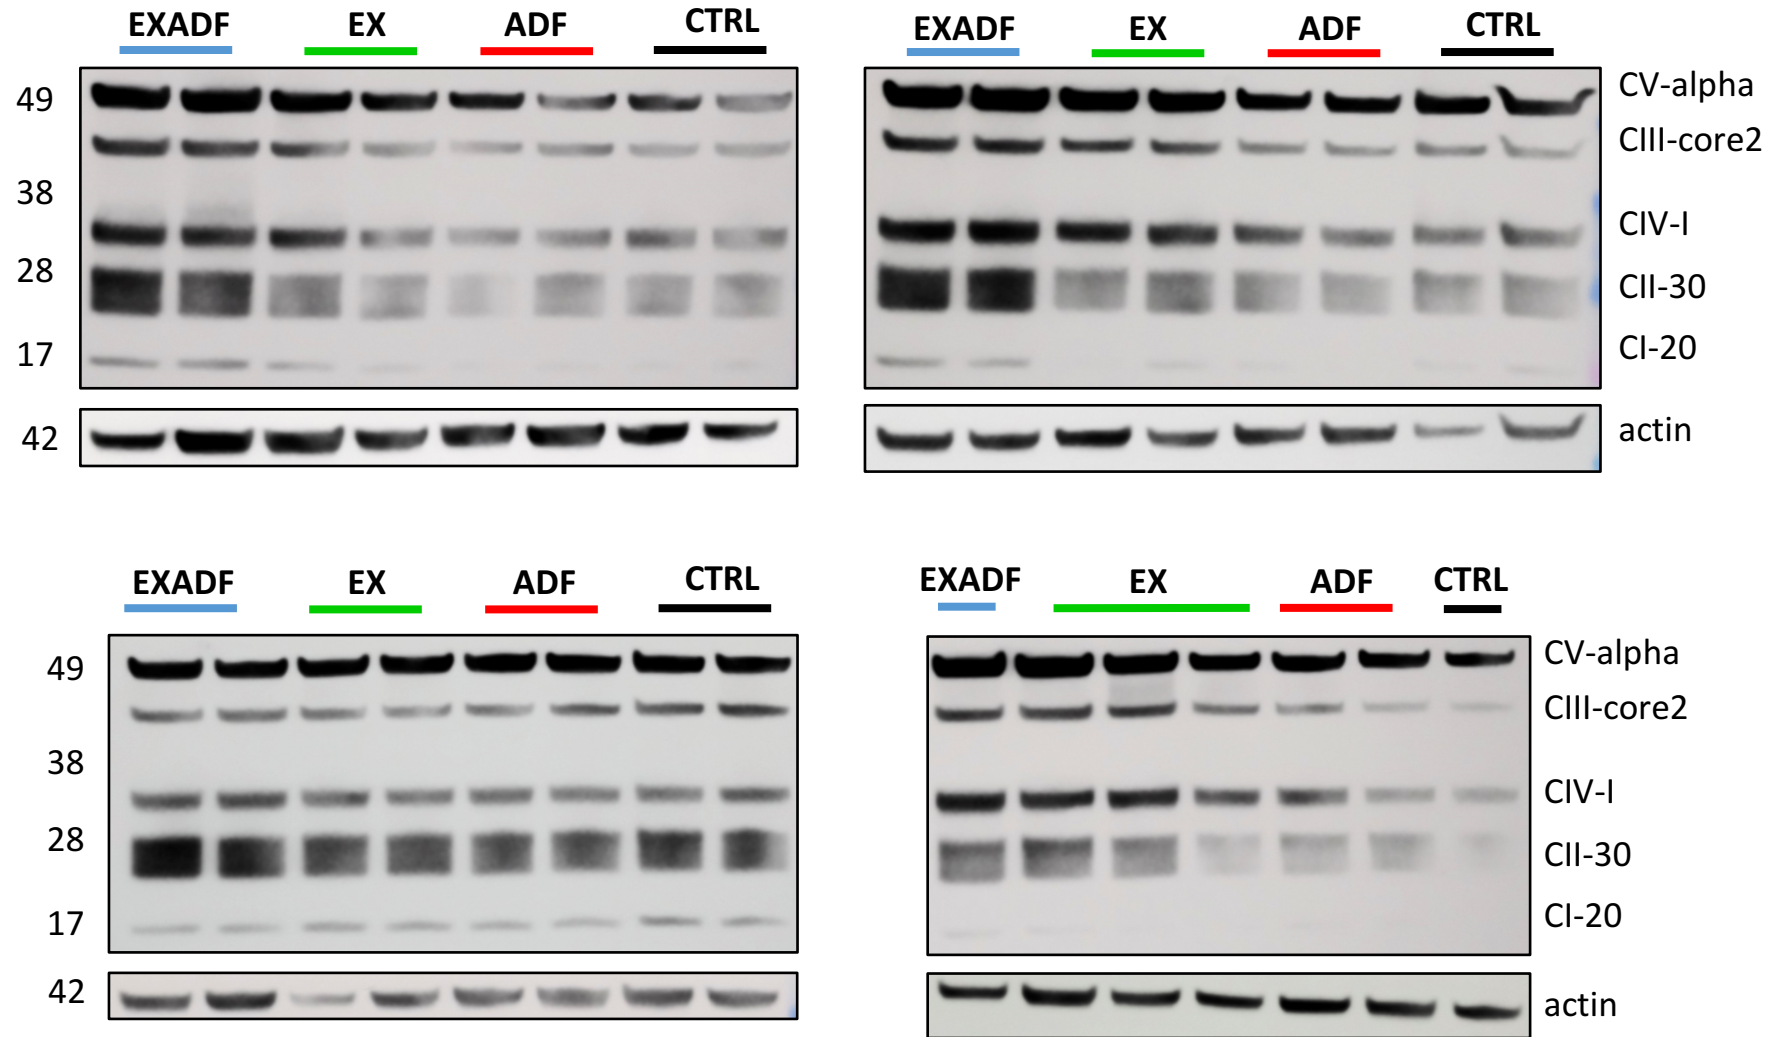

Supplement: fj.201701378RR.sd1.pdf [file fj.201701378RR.sd1.pdf]
